# Supplementary material for: Domains and determinants of retirement timing: A systematic review of longitudinal studies
Source: Springer Nature journal article supplement (doi:10.1186/s12889-018-5983-7), 2018-08-31
Supplement: MOESM1 [file 16089182]

## ADDITIONAL FILE 1

Search terms Web of Science

| #  | Amount of articles | Search term                                                                                                                                                                                                                                    |
|----|--------------------|------------------------------------------------------------------------------------------------------------------------------------------------------------------------------------------------------------------------------------------------|
| #3 | 451                | #2 AND #1<br><br>Indexes=SCI-EXPANDED, SSCI,<br>A&HCI Timespan=All years                                                                                                                                                                       |
| #2 | 1.080.037          | TS=(“cohort” OR “longitudinal” OR<br>“prospective” OR “retrospective”)<br><br>Indexes=SCI-EXPANDED, SSCI,<br>A&HCI Timespan=All years                                                                                                          |
| #1 | 2.639              | TS=(“retir*” NEAR/2 (“time” OR<br>“timing” OR “early” OR “earlier” OR<br>“anticipat*” OR “prepar*” OR<br>“transition*” OR “intention*” OR<br>“expectation*” OR “application*”))<br><br>Indexes=SCI-EXPANDED, SSCI,<br>A&HCI Timespan=All years |
